# Supplementary material
Source: PubMed Central journal article supplement (PMC6440200)
Supplement: NIHMS1011699-supplement-1.pdf [file NIHMS1011699-supplement-1.pdf]

SUPPLEMENTARY TABLES:

| <b>Table S1. Key Variable Data Dictionary for Timing-Related Summary Variables in the INZEIT Pilot Study.</b> |                                                                                                    |                  |                                                                                                                                                                                              |
|---------------------------------------------------------------------------------------------------------------|----------------------------------------------------------------------------------------------------|------------------|----------------------------------------------------------------------------------------------------------------------------------------------------------------------------------------------|
| <b>Exposure</b>                                                                                               | <b>Survey Question</b>                                                                             | <b>Time Sent</b> | <b>Response Options/<br/>n per category</b>                                                                                                                                                  |
| <b>Timing of First Exposure to Outdoor Light</b>                                                              | Today, when was the first time you were outdoors in daylight (without a roof above your head)?     | 7 PM             | 1: 5:00 - 08:00 AM, n=36<br>2: 8:00 - 10:00 AM, n=53<br>3: 10:00 AM - 05:00 PM, n=35<br>4: 05:00 - 10:00 PM, n=1<br>5: I wasn't outdoors, n=N/A                                              |
| <b>Timing of Last Exposure to Outdoor Light</b>                                                               | Yesterday, when was the last time you were outdoors in daylight (without a roof above your head)?  | 9 AM             | 1: 5:00 - 08:00 AM, n=0<br>2: 8:00 - 10:00 AM, n=4<br>3: 10:00 AM - 05:00 PM, n=30<br>4: 05:00 - 10:00 PM, n=91<br>5: I wasn't outdoors, n=N/A                                               |
| <b>Timing of First Exposure to Indoor Light</b>                                                               | This morning, after awakening when was the first time you were exposed to indoor artificial light? | 1 PM             | 1: Before 5:00 AM, n=4<br>2: 5:00 - 6:30 AM, n=21<br>3: 6:30 - 7:45 AM, n=48<br>4: 7:45 - 9:45 AM, n=44<br>5: 9:45 - 11:00 AM, n=5<br>6: 11:00 AM - 12:00 noon, n=2<br>7: After 12 noon, n=1 |

**Running Head:** Timing of meals, activity, light, & sleep with BMI

|                                                       |                                                                                                                                                                |             |                                                                                                                                                                                                                                                                                                                                                              |
|-------------------------------------------------------|----------------------------------------------------------------------------------------------------------------------------------------------------------------|-------------|--------------------------------------------------------------------------------------------------------------------------------------------------------------------------------------------------------------------------------------------------------------------------------------------------------------------------------------------------------------|
| <p><b>Timing of Last Exposure to Indoor Light</b></p> | <p>Yesterday, when was the last time you were exposed to indoor artificial light before going to bed?</p>                                                      | <p>9 AM</p> | <p>1: 07:00 - 08:00 PM, n=2<br/>                 2: 08:00 - 09:00 PM, n=3<br/>                 3: 09:00 - 10:15 PM, n=16<br/>                 4: 10:15 PM - 12:45 AM, n=86<br/>                 5: 12:45 - 2:00 AM, n=13<br/>                 6: 2:00 - 3:00 AM, n=5</p>                                                                                     |
| <p><b>Timing of First Eating Episode</b></p>          | <p>This morning, when did you first eat or drink?<br/><br/>                 (Note: black coffee, diet soda etc. that do not contain calories do NOT count)</p> | <p>1 PM</p> | <p>1: Before 5:00 AM, n=0<br/>                 2: 5:00 - 6:30 AM, n=5<br/>                 3: 6:30 - 7:45 AM, n=12<br/>                 4: 7:45 - 9:45 AM, n=50<br/>                 5: 9:45 - 11:00 AM, n=29<br/>                 6: 11:00 AM - 12:00 noon, n=22<br/>                 7: I did not consume anything before 12 noon, n=7</p>                 |
| <p><b>Timing of Last Eating Episode</b></p>           | <p>Last night, before bed, when did you eat or drink foods or beverages? (Note: black coffee, diet soda etc. without calories do NOT count)</p>                | <p>9 AM</p> | <p>1: Before 5:00 PM, n=3<br/>                 2: 5:00 - 6:00 PM, n=1<br/>                 3: 6:00 - 7:00 PM, n=6<br/>                 4: 7:00 - 8:00 PM, n=14<br/>                 5: 8:00 - 9:00 PM, n=41<br/>                 6: 9:00 - 10:15 PM, n=33<br/>                 7: 10:15 PM - 12:45 AM, n=26<br/>                 8: 12:45 - 2:00 AM, n=1</p> |

**Running Head:** Timing of meals, activity, light, & sleep with BMI

|                                                            |  |      |                                                  |
|------------------------------------------------------------|--|------|--------------------------------------------------|
|                                                            |  |      | 9: 2:00 - 3:00 AM, n=1<br>10: After 3:00 AM, n=0 |
| <b>Proportion of Days Physically Active in the Morning</b> |  | 1 PM | Median=33.33 (range=0-100)                       |
| <b>Proportion of Days Physically Active in the Evening</b> |  | 9 AM | Median=14.29 (range=0-100)                       |

## Running Head: Timing of meals, activity, light, & sleep with BMI

**Table S2. Characteristics of the INZEIT Study Population by Study Site.**

|                                                    | UC San Diego<br>N=43 | Washington<br>University in St.<br>Louis<br>N=40 | Children's<br>Hospital of<br>Philadelphia<br>N=42 |
|----------------------------------------------------|----------------------|--------------------------------------------------|---------------------------------------------------|
| <b>Age, mean (SD)</b>                              | 37.2 (12.0)          | 37.9 (11.4)                                      | 30.8 (7.8)                                        |
| <b>White, non-Hispanic, n (%)</b>                  | 21(48.8)             | 23(57.5)                                         | 24(57.1)                                          |
| <b>Male, n (%)</b>                                 | 17(39.5)             | 12(30.0)                                         | 16(38.1)                                          |
| <b>BMI (kg/m<sup>2</sup>)</b>                      | 27.7 (6.2)           | 27.6 (6.7)                                       | 27.6 (6.9)                                        |
| <b>Education, n (%)</b>                            |                      |                                                  |                                                   |
| High school or less                                | 5(11.6)              | 5(12.5)                                          | 9(21.4)                                           |
| Some college                                       | 9(20.9)              | 9 (22.5)                                         | 11(26.2)                                          |
| Completed college                                  | 24 (55.8)            | 15(37.5)                                         | 14(33.3)                                          |
| Graduate training                                  | 5(11.6)              | 11(27.5)                                         | 8(19.1)                                           |
| <b>Income, n (%)<sup>1</sup></b>                   |                      |                                                  |                                                   |
| <\$25,000                                          | 6(15.0)              | 13(36.1)                                         | 9(24.3)                                           |
| \$25,000 - <\$50,000                               | 15(37.5)             | 6(16.7)                                          | 15(40.5)                                          |
| \$50,000 - <\$75,000                               | 5(12.5)              | 7(19.4)                                          | 6(16.2)                                           |
| \$75,000 - <\$100,000                              | 7(17.5)              | 7(19.4)                                          | 4(10.8)                                           |
| \$100,000                                          | 7(17.5)              | 3(8.3)                                           | 3(8.1)                                            |
| <b>Total Sleep Time, min/night, mean (SD)</b>      | 422.1 (56.7)         | 410.8 (52.4)                                     | 416.6 (50.5)                                      |
| <b>Activity, Axis-1 CPM<sup>2</sup>, mean (SD)</b> | 1193.2 (378.0)       | 1085.0 (302.9)                                   | 1072.18 (419.1)                                   |
| <b>Horne-Ostberg Score<sup>3</sup>, mean (SD)</b>  | 56.6 (9.9)           | 57.4 (10.9)                                      | 54.2 (8.6)                                        |

Abbreviations: CPM: counts per minute; MVPA: moderate-to-vigorous intensity physical activity.

Note: Participants were enrolled from November 2015 to March 2016 at UC San Diego, Children's Hospital of Philadelphia, and Washington University in St. Louis.

<sup>1</sup>Missing data for n=12 participants.

<sup>2</sup>Total activity derived from wrist actigraphy based on mean daily counts per minute on the vertical-axis.

<sup>3</sup>Scores indicate diurnal preference; higher scores indicate greater preference for morning; data missing for one participant.

**Table S3. Separate Multivariable Regression Models of Associations Between Dichotomous Timing Exposures and BMI.**

|                                                  | b (95% CI)           | P-value |
|--------------------------------------------------|----------------------|---------|
| Late last outdoor light exposure (after 5 pm)    | -3.36 (-5.73, -1.00) | 0.006   |
| Late last indoor light exposure (after 12:45 am) | -0.47 (-3.61, 2.67)  | 0.77    |
| Late first indoor light exposure (after 7:45 am) | -0.49 (-2.89, 1.91)  | 0.69    |

\*Models are adjusted for age, race/ethnicity, and education

**Table S4. Separate Multivariable Regression Models of Associations Between the Day-to-Day Variability in the Timing of Each Behavior and BMI.**

|                                                         | b (95% CI)         | P-value |
|---------------------------------------------------------|--------------------|---------|
| Variability in timing of last exposure to outdoor light | 0.28 (-0.76, 1.32) | 0.60    |
| Variability in timing of last exposure to indoor light  | 0.57 (-0.43, 1.57) | 0.26    |
| Variability in timing of first exposure to indoor light | 0.51 (-0.53, 1.55) | 0.33    |

\*Models are adjusted for age, race/ethnicity, and education
